# Supplementary material
Source: PubMed Central journal article supplement (PMC3091198)
Supplement: supp_M110.201814_jbc.M110.201814-1.pdf [file supp_M110.201814_jbc.M110.201814-1.pdf]

**Supplemental Data**

**MOLECULAR MECHANISM OF THE NEGATIVE REGULATION OF SMAD1/5 BY  
CHIP**

**Le Wang<sup>1</sup>, Yi-Tong Liu<sup>1</sup>, Rui Hao<sup>1</sup>, Lei Chen<sup>1</sup>, Zhijie Chang<sup>2</sup>, Hong-Rui Wang<sup>3</sup>, Zhi-Xin  
Wang<sup>1</sup>, and Jia-Wei Wu<sup>1,\*</sup>**

From <sup>1</sup>MOE Key Laboratory of Bioinformatics, School of Life Sciences, Tsinghua University, Beijing 100084, China, <sup>2</sup>State Key Laboratory of Biomembrane and Membrane Biotechnology, School of Medicine, Tsinghua University, Beijing 100084, China, and <sup>3</sup>MOE Key Laboratory of Cell Biology and Tumor Cell Engineering, School of Life Sciences, Xiamen University, Xiamen, Fujian 361005, China

Running title: CHIP-mediated repression of Smad1/5

\*Address correspondence to: Jia-Wei Wu, School of Life Sciences, Tsinghua University, Beijing 100084, China; Phone: 86-10-62789387; Fax: 86-10-62792826; E-mail: [jiaweiwu@mail.tsinghua.edu.cn](mailto:jiaweiwu@mail.tsinghua.edu.cn).

**Supplemental Table S1.** Detailed purification procedures for proteins used

| <b>Protein</b> | <b>Vector</b> | <b>Affinity column</b> | <b>Ion exchange</b>         | <b>Gel filtration</b> |
|----------------|---------------|------------------------|-----------------------------|-----------------------|
| CHIP           | pGEX-4T-2     | GST                    | Source-15Q<br>Source-15S    |                       |
| CHIP-TPR       | pET-Duet-1    | Ni-NTA                 | Source-15S                  |                       |
| CHIP-CC        | pGEX-4T-2     | GST                    | Source-15Q                  |                       |
| CHIP-Ubox      | pGEX-4T-2     | GST                    |                             | Superdex-200          |
| CHIP-ΔTPR      | pGEX-4T-2     | GST                    |                             | Superdex-200          |
| Smad1          | pGEX-4T-2     | GST                    | Source-15Q                  | Superdex-200          |
| Smad1-MH1      | pGEX-4T-2     | GST                    |                             |                       |
| Smad1-MH1-L    | pGEX-4T-2     | GST                    |                             |                       |
| Smad1-L-MH2    | pGEX-4T-2     | GST                    | Source-15Q                  | Superdex-200          |
| Smad1-MH2      | pGEX-4T-2     | GST                    | Source-15Q                  | Superdex-200          |
| Smad2-MH1      | pGEX-4T-2     | GST                    |                             |                       |
| Smad2-L-MH2    | pGEX-4T-2     | GST                    | Source-15Q                  | Superdex-200          |
| Smad2-MH2(DMD) | pET-21b       |                        | Sp sepharose<br>Q sepharose |                       |
| Smad3-MH1      | pGEX-4T-1     | GST                    |                             |                       |
| Smad3-L-MH2    | pGEX-4T-2     | GST                    | Source-15Q                  | Superdex-200          |
| Smad4-MH1      | pGEX-4T-2     | GST                    |                             |                       |
| Smad4-L-MH2    | pGEX-4T-2     | GST                    | Source-15Q                  | Superdex-200          |
| Smad5-MH1      | pGEX-4T-2     | GST                    |                             |                       |
| Smad5-L-MH2    | pGEX-4T-2     | GST                    | Source-15Q                  | Superdex-200          |
| Hsp70-CTD      | pGEX-2T       | GST                    | Source-15Q                  |                       |
| E1             | pET-Duet-1    | Ni-NTA                 |                             |                       |
| E2(UbcH5a)     | pET-Duet-1    | Ni-NTA                 |                             |                       |
| Ubiquitin      | pET-Duet-1    | Ni-NTA                 | Source-15Q                  | Superdex-200          |

GST- or His<sub>6</sub>-tag was proteolytically removed from the fusion proteins to prepare nontag proteins. All point mutants used were similarly purified to their corresponding wild-type proteins.



### Supplemental Figure S2

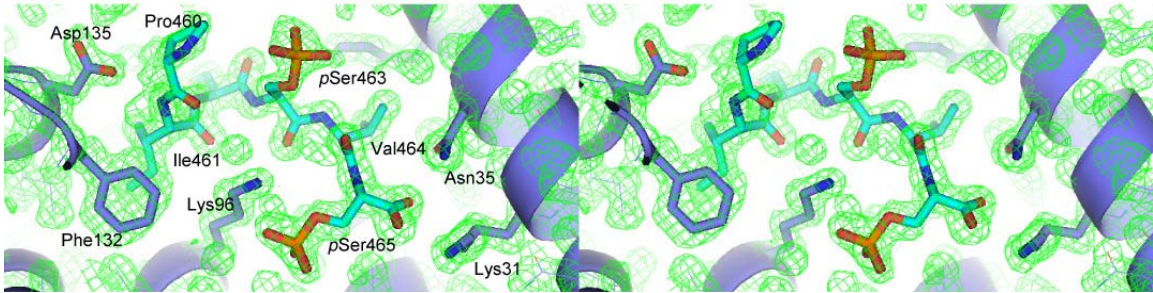

**Supplemental Fig. S2** Stereo image of the  $2F_o - F_c$  map (green mesh) around the phosphor-Smad1 peptide (cyan sticks). CHIP-TPR is colored in slate, and residues surrounding Smad1 peptide are shown in sticks.

### Supplemental Figure S3

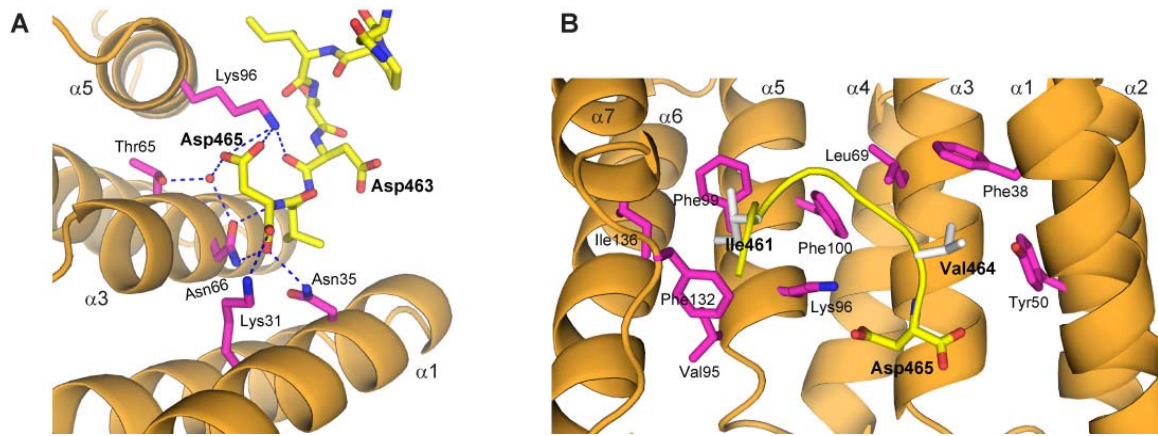

**Supplemental Fig. S3** Hydrophilic and hydrophobic contacts between CHIP-TPR and the pseudophosphorylated Smad1(DVD) peptide. The two views were oriented same as the ones in Fig. 3C and 3D, respectively. (A) Hydrogen bond networks at the interface of CHIP-TPR and Smad1(DVD) peptide. CHIP-TPR is colored in orange and the critical residues are highlighted in magentas sticks. The Smad1 peptide is shown as yellow sticks. (B) van der Waals contacts between CHIP-TPR and pseudophosphorylated Smad1 peptide. The Smad1 peptide is shown as yellow ribbon and the hydrophobic residues are highlighted in grey sticks.

### Supplemental Figure S4

A

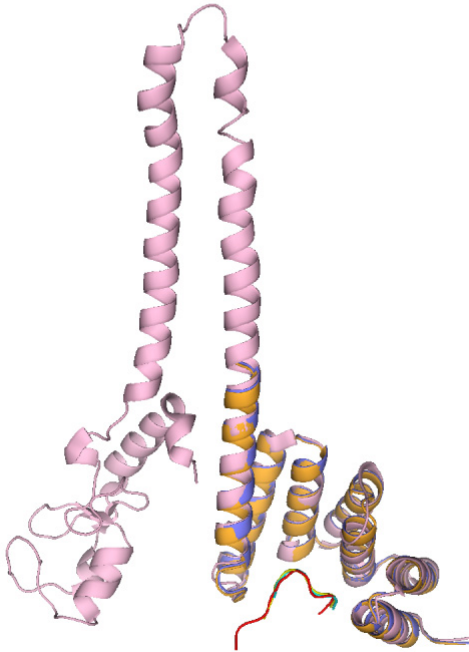

B

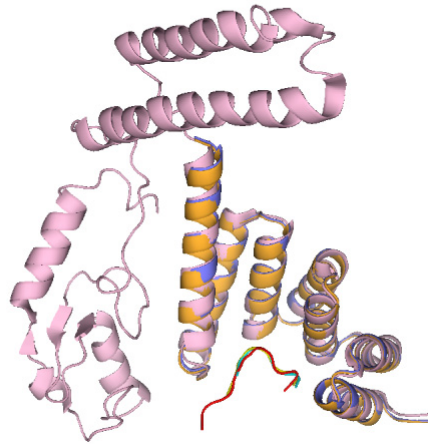

**Supplemental Fig. S4** Superposition of the CHIP-Smad1 structures with the counterparts in the dimeric structure of full-length CHIP in complex with Hsp90-C peptide (PDB ID: 2C2L). The two asymmetric full-length CHIP molecules are colored in pink and the bound Hsp90-C peptides in red. The CHIP-Smad1 peptide structures are colored the same as Fig. 3A and 3B.

### Supplemental Figure S5

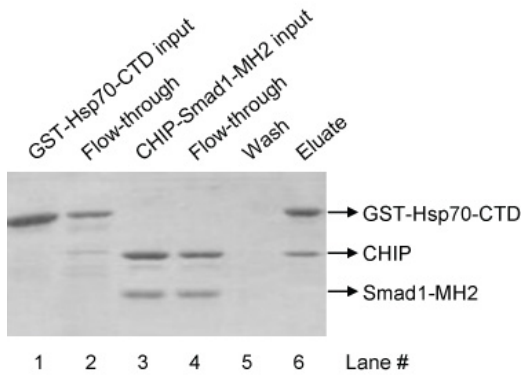

**Supplemental Fig. S5** Disruption of CHIP-Smad1 complex by Hsp70-CTD. Recombinant GST-Hsp70-CTD was first bound to 0.2 ml Glutathione Sepharose 4B resin. The resin was washed five times with 1.0 ml buffer to remove excess unbound Hsp70 or other contaminants. Then, non-tagged CHIP-Smad1 complex was allowed to flow through the resin. After extensive washing, the bound proteins were eluted with 5 mM reduced glutathione, and all fractions were visualized by SDS-PAGE with Coomassie Blue staining.

**Supplemental Figure S6**

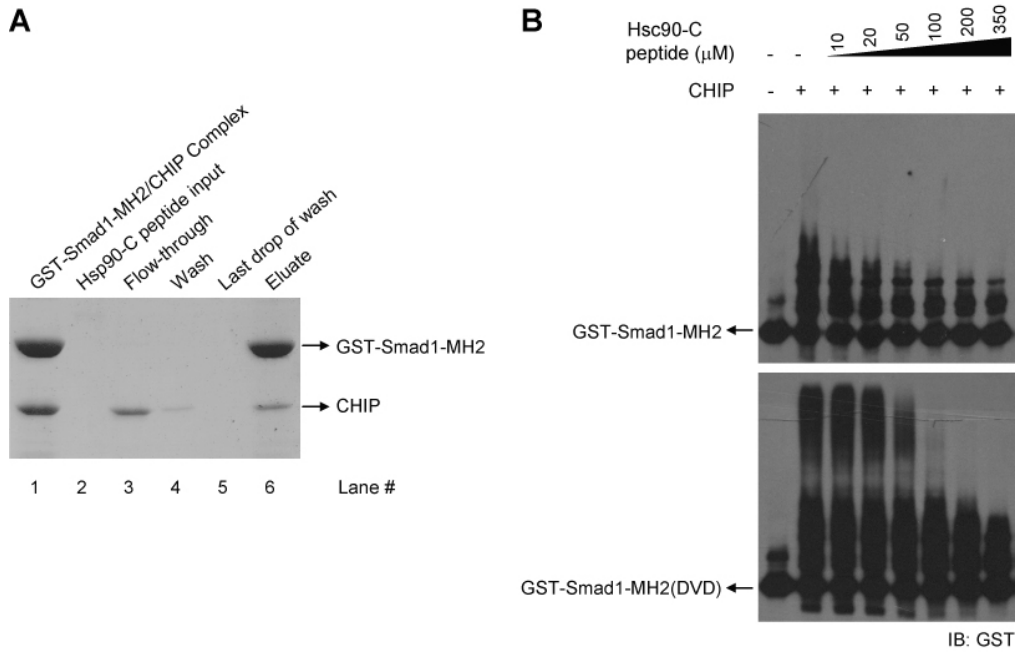

**Supplemental Fig. S6** Hsp90-C peptide disrupts CHIP-Smad1 interaction and inhibits CHIP-mediated Smad1 ubiquitination. **(A)** Hsp90-C peptide competing with Smad1 for CHIP binding. The complex of GST-Smad1 and CHIP was loaded to the resin, followed by the addition of the Hsp90-C peptide. The column was then washed extensively and eluted with reduced glutathione. Samples were visualized by SDS-PAGE with Coomassie Blue staining. **(B)** Hsp90-C peptide antagonizing CHIP-mediated Smad1 ubiquitination. *In vitro* ubiquitination assays were performed in the absence or presence of increasing amount of Hsp90-C peptide.
